# Supplementary material for: High entropy alloy nanoparticles encapsulated into carbon nanotubes enable high performance of zinc air batteries
Source: Royal Society of Chemistry journal article supplement (doi:10.1039/d4cc04069d), 2024-01-01
Supplement: d4cc04069d1.pdf [file d4cc04069d1.pdf]

## Supporting information

for

### **High entropy alloy nanoparticles encapsulated into carbon nanotubes enable high performance of zinc air battery**

Shuyuan Pan<sup>a,b#</sup>, Han Shi<sup>b#</sup>, Yingjie Yu<sup>a</sup>, Yifei Li<sup>c</sup>, Yazhou Chen<sup>a\*</sup>, Chunsheng Li<sup>d,e</sup>, Yan Sun<sup>d,e\*</sup>, Zehui Yang<sup>b</sup> and Fang Luo<sup>a\*</sup>

<sup>a</sup>College of Materials Science and Engineering, State Key Laboratory of New Textile Materials & Advanced Processing Technology, Wuhan Textile University, Wuhan, 430200, China.

<sup>b</sup>Faculty of Materials Science and Chemistry, China University of Geosciences Wuhan, 388 Lumo RD, Wuhan, 430074, China.

<sup>c</sup>School of Engineering, Huzhou University, Huzhou, 313000, China

<sup>d</sup>School of Chemistry and Life Sciences, Suzhou University of Science and Technology, Suzhou City, Jiangsu Province 215009, China.

<sup>e</sup>Key Laboratory of Advanced Electrode Materials for Novel Solar Cells for Petroleum and Chemical Industry of China, Suzhou University of Science and Technology, Suzhou City, Jiangsu Province 215009, China.

## **Experimental section**

**Synthesis of FeCoNiMnIr/NCNT:** Dicyandiamide (1.5 g, 99%, Sigma-Aldrich),  $\text{CoCl}_2 \cdot 6\text{H}_2\text{O}$  (0.2 mmol, 97%, Sigma-Aldrich),  $\text{FeCl}_3 \cdot 6\text{H}_2\text{O}$  (0.2 mmol, 98%, Sigma-Aldrich),  $\text{NiCl}_2 \cdot 6\text{H}_2\text{O}$  (0.2 mmol, 98%, Sigma-Aldrich),  $\text{MnCl}_2 \cdot 6\text{H}_2\text{O}$  (0.2 mmol, 99%, Sigma-Aldrich),  $\text{IrCl}_3$  (0.1 mmol, 99.8%, Sigma-Aldrich) and 80 mL of ethanol were stirred and mixed for 2 h at room temperature (25 °C). Consequently, the mixture was heated to 80 °C and stirred to evaporate the solvent. The obtained powder was transferred to a mortar and ground into a fine powder. The powder was then placed in a tube furnace and heated under  $\text{N}_2$  at 10 °C  $\text{min}^{-1}$  to 800 °C for 2 h to produce FeCoNiMnIr/NCNT electrocatalyst. Fe/NCNT was synthesized by heating  $\text{FeCl}_3 \cdot 6\text{H}_2\text{O}$  and dicyandiamide at 800 °C for 2 h under  $\text{N}_2$  flow. NCNT was obtained by strong acid (1 M  $\text{H}_2\text{SO}_4$ ) treatment of Fe/NCNT at 60 °C for 10 h.

**Fundamental characterizations:** The phase analysis of the samples was obtained by XRD pattern obtained from Bruker D8 Advance. Structure characterization of the electrocatalyst was analyzed by X-ray photoelectron spectroscopy (XPS) (ThermoFisher, USA). The microscopic morphology of these samples was obtained by observation with a field emission electron microscope (SEM, SU8010, Japan). The microstructure and EDS mapping of the samples were analyzed by high resolution electron projection microscopy (TEM, FEI themis 300, United States).

**Oxygen evolution reaction (OER):** At room temperature, the three-electrode system (glassy carbon electrode-working electrode, carbon rod-counter electrode, Hg/HgO electrode-reference electrode) was used to complete the oxygen evolution reaction (OER) performance test by the Gamry Interface 1000E instrument. 2 mg of the

catalyst was dispersed into 1 mL solution, which was made up of 780  $\mu\text{L}$  of deionized water, 200  $\mu\text{L}$  of ethanol and 20  $\mu\text{L}$  of Nafion. And the electrocatalyst loading on working electrode (a diameter of 3 mm) surface was 0.285  $\text{mg cm}^{-2}$ . The performance test of the catalyst was measured by LSV (5  $\text{mV s}^{-1}$ , 1.1-1.8 V vs. RHE), and the stability was measured by CA.

**Oxygen reduction reaction (ORR):** The ORR test environment was the same as the OER test. In a saturated  $\text{O}_2$  environment, the three-electrode system was used to test the oxygen reduction performance of the catalyst, except that the working electrode was replaced with a rotating disk electrode (RDE). The configuration of “Ink” was the same as that of OER. The catalyst loading on the working electrode (a diameter of 4 mm) was 0.285  $\text{mg cm}^{-2}$ . The performance test of the catalyst was measured by LSV (5  $\text{mV s}^{-1}$ , 1.1-1.8 V vs. RHE) at different rotating speeds (400, 600, 800, 1200, 1600, 2400 rpm) and the stability was measured by i-t.

**Aqueous zinc-air battery test:** A home-made zinc air battery performance testing device was used. The active area was 1\*1 cm and commercial zinc foil was polished before using as anode. PTFE plate was used to seal the electrolyte (6 M KOH+0.2 M zinc acetate). The electrocatalyst (1 mg) was dispersed in ethanol (200  $\mu\text{L}$ ), 5 wt% Nafion solution (20  $\mu\text{L}$ ) and deionized water (780  $\mu\text{L}$ ) by sonication. The resultant electrocatalyst ink was sprayed onto a 1\*1 cm carbon paper. During the long-term operation, the electrolyte was manually replaced every 50 h.

**All-solid-state zinc-air battery test:** Polyvinyl alcohol (PVA, 1 g) was dissolved in 10 mL of deionized water to swell, and then heated to 95  $^{\circ}\text{C}$  until the polymer was

completely dissolved for 2 h, and then electrolyte (consisting of 18 M KOH+0.2 M zinc acetate, 1 mL) was added dropwise , the obtained jelly was scraped (400  $\mu$ m) with a spatula on a flat glass plate, frozen for 1 h, refrigerated for 12h, and immersed in the same electrolyte for 12 h before being used. The battery composition was basically the same as that of aqueous zinc-air battery, except that the electrolyte was replaced with a polymer electrolyte.

**Table S1** Comparison of zinc air battery performance with recently reported electrocatalysts.

| <b>Electrocatalyst</b>                                               | <b>Power density (mW cm<sup>-2</sup>)</b> | <b>Reference</b> |
|----------------------------------------------------------------------|-------------------------------------------|------------------|
| FeCoNiMnIr/NCNT                                                      | 214                                       | This work        |
| Fe <sub>3</sub> C/Fe <sub>2</sub> O <sub>3</sub> @NGN                | 139.8                                     | 1                |
| Co/CoO@FeNC-850                                                      | 132.8                                     | 2                |
| Co-NC@LDH                                                            | 107.8                                     | 3                |
| Co <sub>3</sub> O <sub>4</sub> @NiFe LDH                             | 127.4                                     | 4                |
| FeNiS-NBC/C                                                          | 133.0                                     | 5                |
| P-CoNi@NSCs                                                          | 87.9                                      | 6                |
| Ni-Co/NFC <sub>2</sub>                                               | 138.0                                     | 7                |
| TMB@NiNC                                                             | 107.0                                     | 8                |
| Ni <sub>3</sub> S <sub>4</sub> @CoS <sub>x</sub> -NF                 | 143.0                                     | 9                |
| Sr <sub>2</sub> Fe <sub>1.5</sub> Mo <sub>0.5</sub> O <sub>6-δ</sub> | 137.0                                     | 10               |
| MnO <sub>x</sub> -FeNi LDH/NF                                        | 120                                       | 11               |
| Co-NC@Nb-TiO <sub>x</sub>                                            | 123.46                                    | 12               |

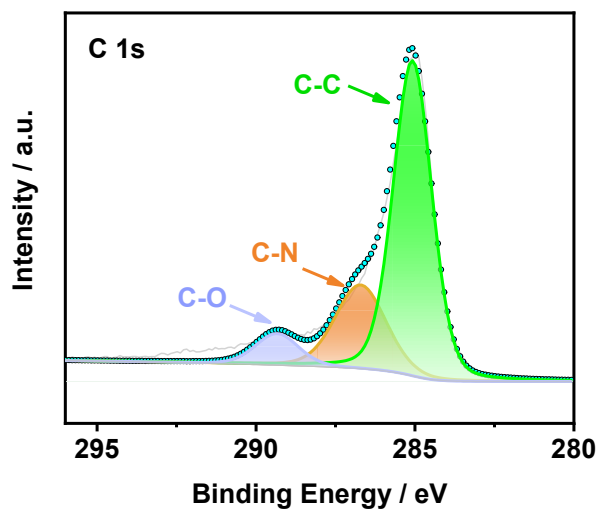

Figure S1 C 1s XPS peak of FeCoNiMnIr/NCNT.

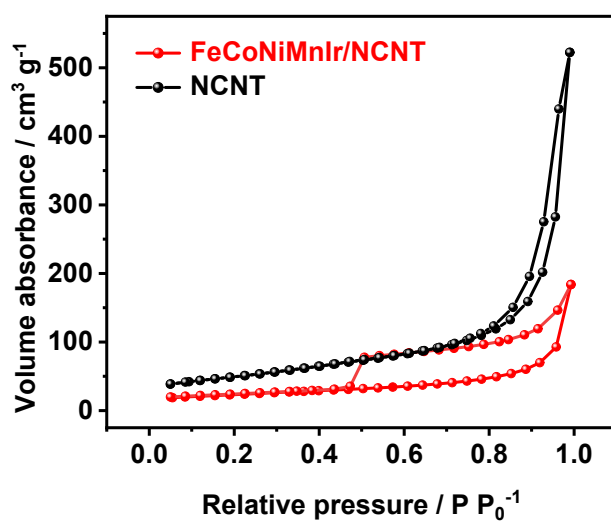

Figure S2  $\text{N}_2$  isothermal curves of NCNT and FeCoNiMnIr/NCNT.

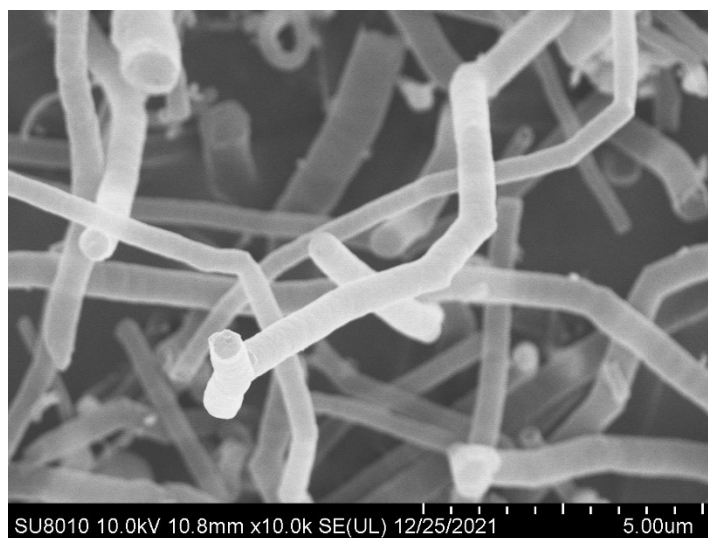

Figure S3 SEM image of NCNT.

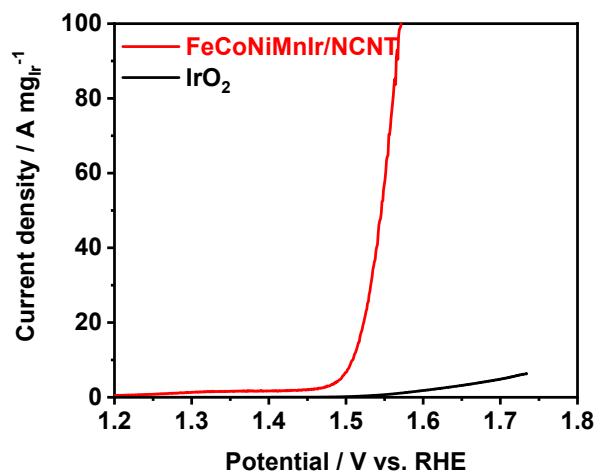

**Figure S4** Mass activity of FeCoNiMnIr/NCNT and commercial IrO<sub>2</sub>.

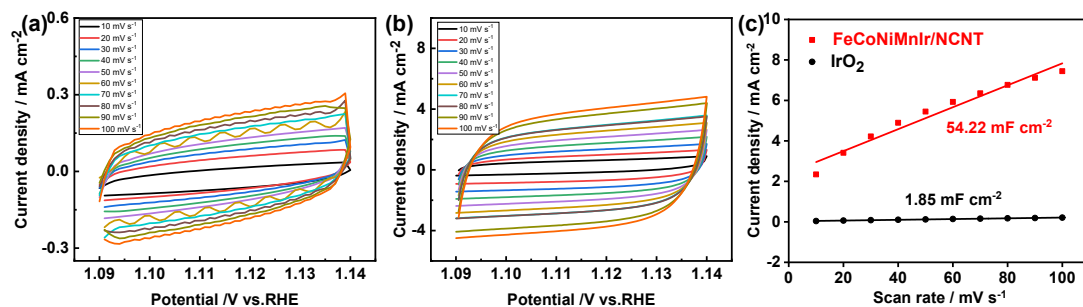

**Figure S5** Cyclic voltammetry curves of IrO<sub>2</sub> (a) and FeCoNiMnIr/NCNT (b).  $C_{dl}$  of IrO<sub>2</sub> and FeCoNiMnIr/NCNT.

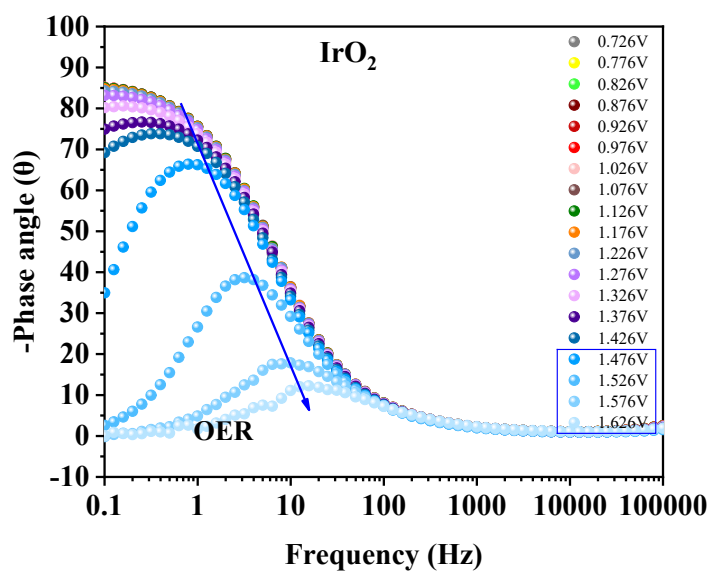

**Figure S6** *in-situ* electrochemical impedance spectroscopy of commercial IrO<sub>2</sub>.

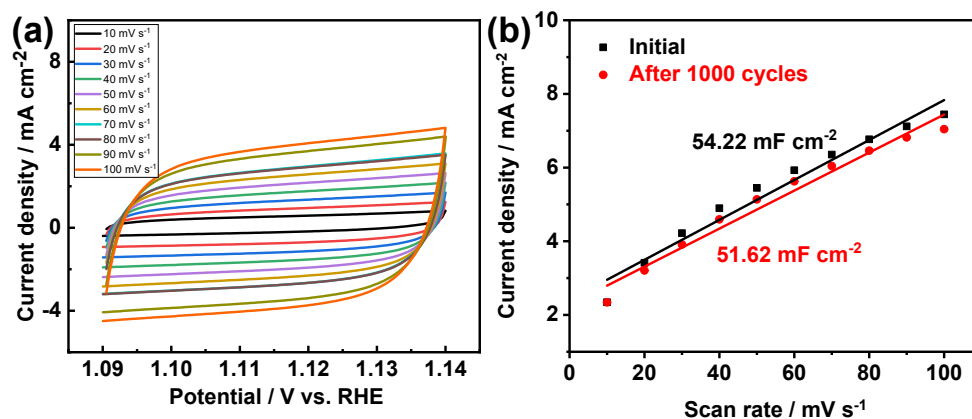

**Figure S7** Cyclic voltammery curve (a) and  $C_{dl}$  (b) of FeCoNiMnIr/NCNT after 1000 cycles.

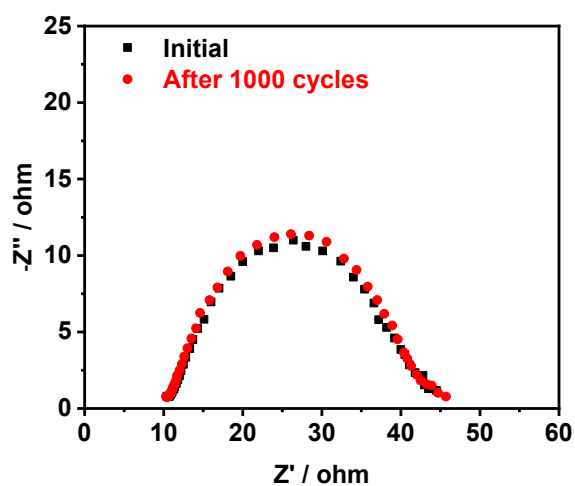

**Figure S8** Electrochemical impedance spectroscopy of FeCoNiMnIr/NCNT before and after 1000 cycles.

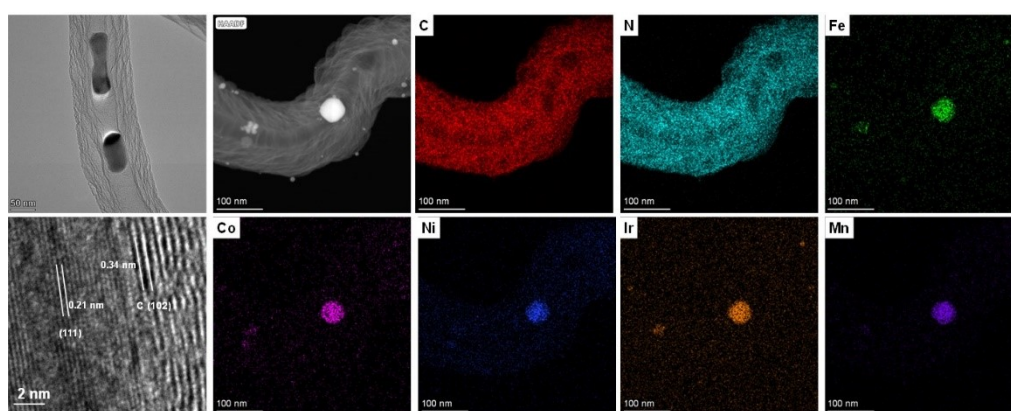

**Figure S9** TEM, HR-TEM, HAADF-STEM and relative EDS mapping of FeCoNiMnIr/NCNT after 1000 cycles.



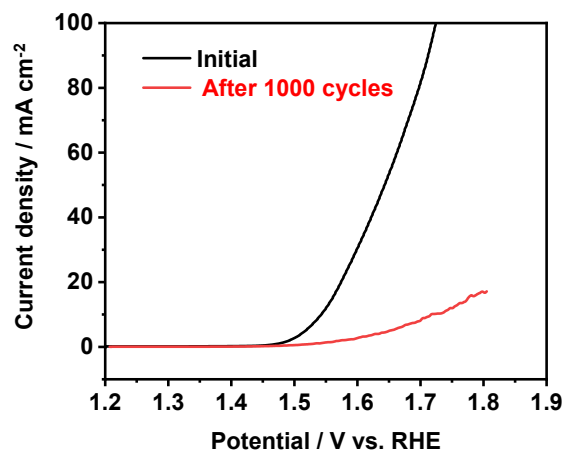

**Figure S10** OER performance of commercial IrO<sub>2</sub> before and after 1000 cycles.

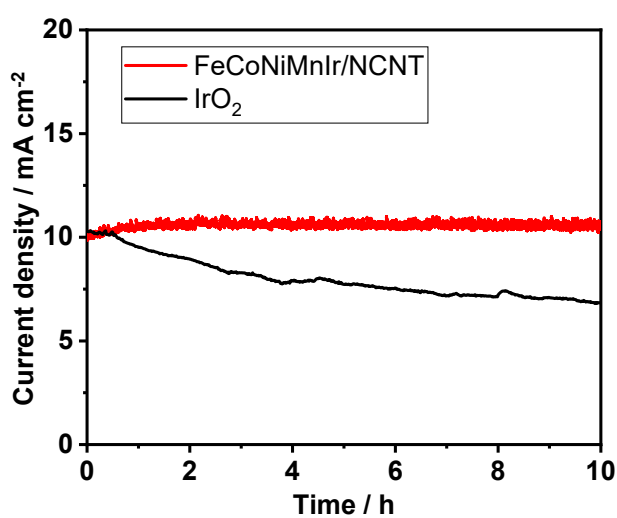

**Figure S11** i-t test of FeCoNiMnIr/NCNT and commercial IrO<sub>2</sub>.

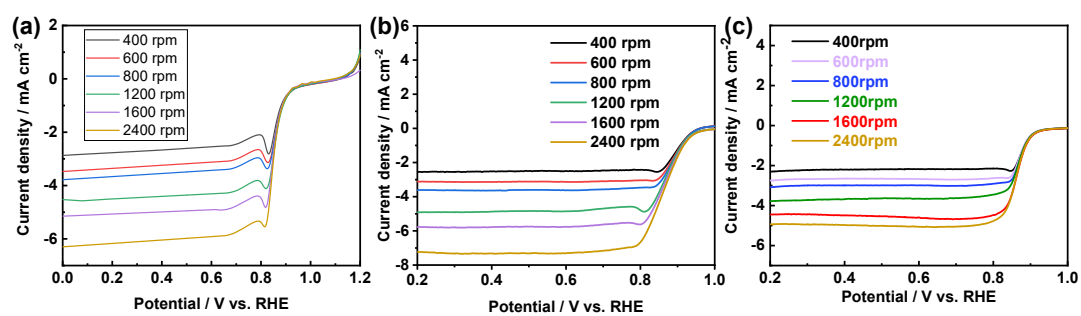

**Figure S12** ORR curves of commercial Pt/C (a), FeCoNiMnIr/NCNT (b) and NCNT

(c).

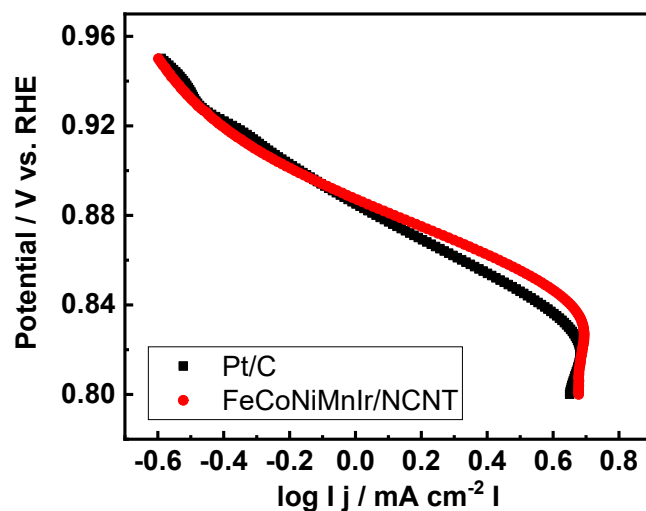

Figure S13 Tafel slope of FeCoNiMnIr/NCNT and Pt/C.

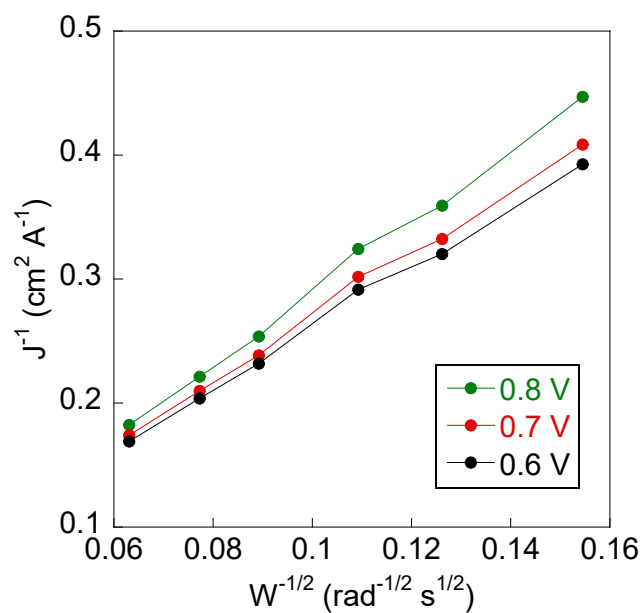

Figure S14 K-L equation of commercial Pt/C at various potentials.

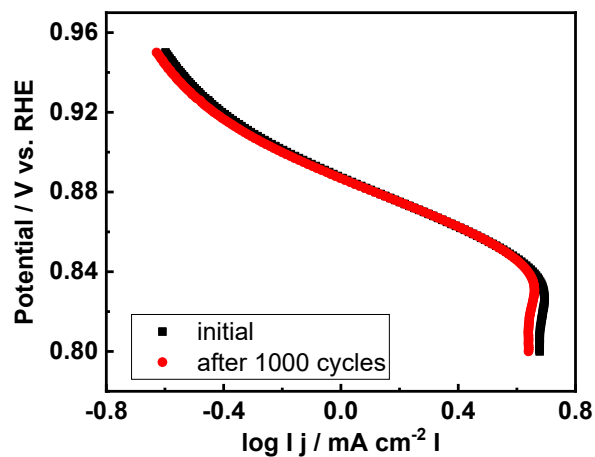

Figure S15 Tafel slope of FeCoNiMnIr/NCNT before and after 1000 cycles.

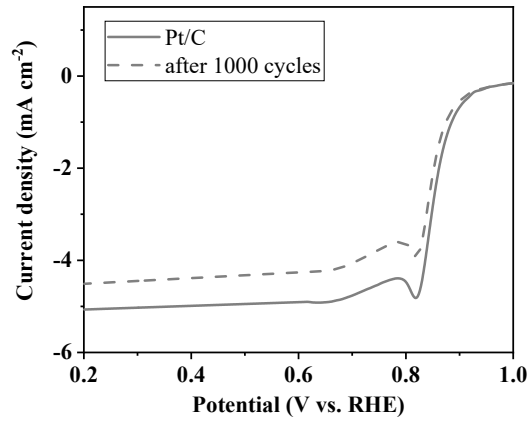

**Figure S16** ORR stability test of commercial Pt/C.

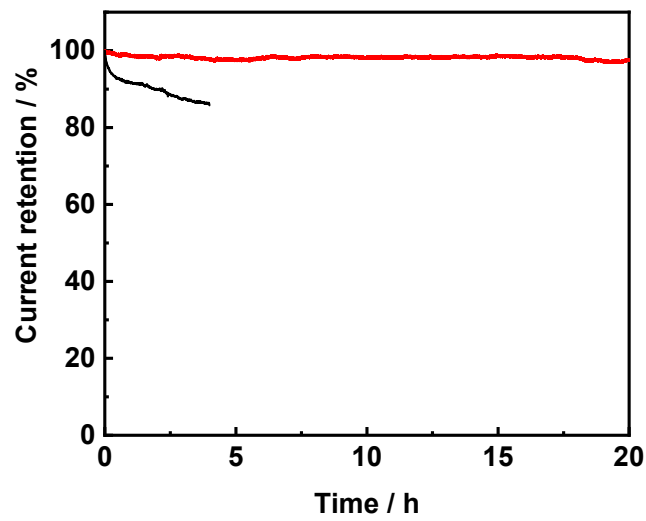

**Figure S17** i-t test of Pt/C and FeCoNiMnIr/NCNT in ORR catalysis.

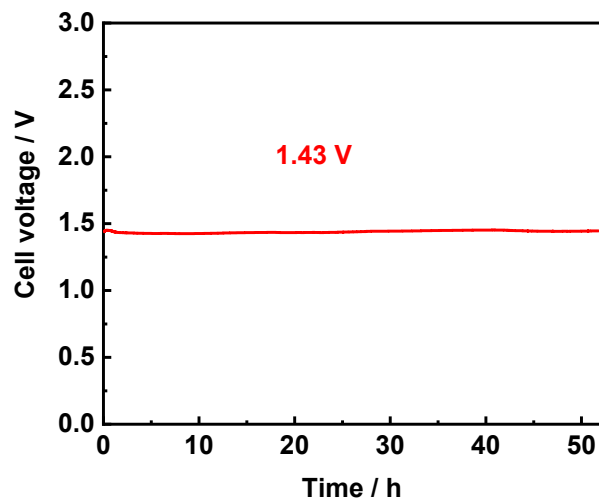

**Figure S18** Open circuit voltage test of rechargeable zinc air battery assembled from FeCoNiMnIr/NCNT.

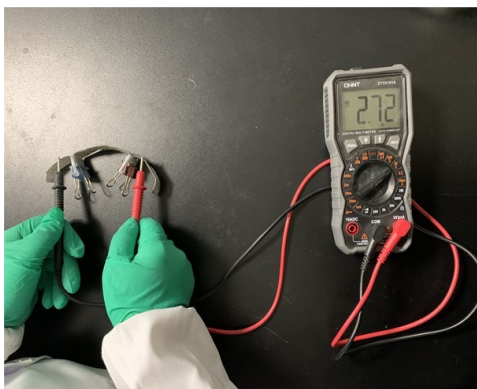

**Figure S19** Open circuit voltage test of two all-solid-state rechargeable zinc air batteries.

### References

1. Y. H. Tian, L. Xu, J. C. Qian, J. Bao, C. Yan, H. N. Li, H. M. Li and S. Q. Zhang, *Carbon*, 2019, **146**, 763-771.
2. Y. Chen, C. Gong, Z. Shi, D. Chen, X. Chen, Q. Zhang, B. Pang, J. Feng, L. Yu and L. Dong, *Journal of Colloid and Interface Science*, 2021, **596**, 206-214.
3. D. Chen, X. Chen, Z. Cui, G. Li, B. Han, Q. Zhang, J. Sui, H. Dong, J. Yu, L. Yu and L. Dong, *Chemical Engineering Journal*, 2020, **399**.
4. X. L. Guo, X. L. Hu, D. Wu, C. Jing, W. Liu, Z. L. Ren, Q. N. Zhao, X. P. Jiang, C. H. Xu, Y. X. Zhang and N. Hu, *Acs Applied Materials & Interfaces*, 2019, **11**, 21506-21514.
5. Y. X. Wang, R. J. Liu, W. D. Chen, W. M. Li, W. Zheng, H. Zhang and Z. Y. Zhang, *Acs Sustainable Chemistry & Engineering*, 2022, **10**, 14486-14494.
6. X. H. He, J. Fu, M. Y. Niu, P. F. Liu, Q. Zhang, Z. Y. Bai and L. Yang, *Electrochimica Acta*, 2022, **413**.
7. M. H. Wang, S. Ji, H. Wang, V. Linkov, X. Y. Wang and R. F. Wang, *Journal of Power Sources*, 2023, **571**.
8. M. Moloudi, A. Noori, M. S. Rahmanifar, Y. Shabangoli, M. F. El-Kady, N. B. Mohamed, R. B. Kaner and M. F. Mousavi, *Advanced Energy Materials*, 2022, DOI: 10.1002/aenm.202203002.
9. M. M. Yin, H. Miao, J. X. Dang, B. Chen, J. Q. Zou, G. M. Chen and H. Li, *Journal of Power Sources*, 2022, **545**.
10. J. Zhou, T. Liu, J. Zhang, L. Zhao, W. He and Y. Wang, *Separation and Purification Technology*, 2023, **304**.
11. L. Wan, P. C. Wang, Y. Q. Lin and B. G. Wang, *Journal of the Electrochemical Society*, 2019, **166**, A3409-A3415.
12. T. T. Wan, H. Y. Wang, L. L. Wu, C. C. Wu, Z. S. Zhang, S. M. Liu, J. Fu and J. D. Li, *Journal of Colloid and Interface Science*, 2023, **651**, 27-35.
